# Supplementary material
Source: PubMed Central journal article supplement (PMC3415237)

## SUPPLEMENTAL DATA

**Table S1. Structures of benzylidene-thiazolidine-2,4-diones compounds.**

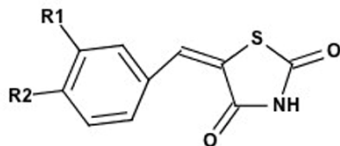

| Compound | R <sub>1</sub>                     | R <sub>2</sub>                     |
|----------|------------------------------------|------------------------------------|
| 1a       | CH <sub>3</sub>                    | H                                  |
| 2a       | H                                  | CH <sub>3</sub>                    |
| 3a       | CF <sub>3</sub>                    | H                                  |
| 4a       | H                                  | CF <sub>3</sub>                    |
| 8a       | C <sub>2</sub> H <sub>5</sub>      | H                                  |
| 9a       | (CH <sub>3</sub> ) <sub>2</sub> CH | H                                  |
| 10a      | CH <sub>3</sub> O                  | H                                  |
| 11a      | CF <sub>3</sub> O                  | H                                  |
| 12a      | H                                  | CH <sub>3</sub> O                  |
| 13a      | H                                  | CF <sub>3</sub> O                  |
| 14a      | C <sub>2</sub> H <sub>5</sub> O    | H                                  |
| 15a      | H                                  | CF <sub>2</sub> HCF <sub>2</sub> O |
| 16a      | C <sub>3</sub> H <sub>7</sub> O    | H                                  |
| 17a      | (CH <sub>3</sub> ) <sub>2</sub> N  | H                                  |
| 18a      | F                                  | H                                  |
| 20a      | H                                  | F                                  |
| 21a      | Cl                                 | H                                  |
| 22a      | H                                  | Cl                                 |
| 23a      | Br                                 | H                                  |
| 24a      | H                                  | Br                                 |

## SUPPLEMENTAL DATA FIGURE LEGENDS:

**Figure S1.** *A*, Comparison of Pim-1 and DYRK1a in vitro kinase activity with peptide substrates. Pim-1 and DYRK1a activity were measured using the coupled kinase assay as described in Materials and Methods with recombinant DYRK1a (Millipore, Billerica, MA) and Woodtide (Millipore, Billerica, MA) as the substrate. Compounds (**4a**, **16a**, harmine) were added at 5  $\mu$ M and values shown with the addition of inhibitors represent the percent activity remaining compared to DMSO control. Some combinations were not tested (NT). *B*, growth inhibition of MV4;11 cells treated for 72 h with Pim inhibitors (5  $\mu$ M), harmine (5  $\mu$ M) with or without rapamycin (5 nM). Leukemic cells were treated, an MTS assay performed as described in Methods and Materials and data analyzed as described in Figure 1C.

**Figure S2.** Amino acid sequence alignment of DYRK1a, Pim-1, and Pim-2. Amino acids identified to contribute to potential inhibitor interactions in the ATP-binding domain of Pim-1 and DYRK1a are shown in bold and numbered with respect to the Pim-1 amino acid sequence. The hinge region is denoted as amino acids 121-128.

**Figure S3.** The Pim inhibitors **4a** and **16a** reduce the level of c-Myc protein in the human leukemic cell line K562. Cells were treated for 4 h with **4a** or **16a** (5  $\mu$ M) under serum-free conditions and the level of c-Myc protein was determined by SDS-PAGE followed by Western blotting.

**Figure S1**

**A**

|        | Bad peptide<br>(RSRHSSYPAGT) |    |     | Woodtide<br>(KKISGRLSPIMTEQ) |    |     |         |
|--------|------------------------------|----|-----|------------------------------|----|-----|---------|
|        | none                         | 4a | 16a | none                         | 4a | 16a | harmine |
| Pim-1  | 100                          | 2  | 8   | 0                            | NT | NT  | NT      |
| DYRK1a | 0                            | NT | NT  | 100                          | 0  | 13  | 4       |

**B**

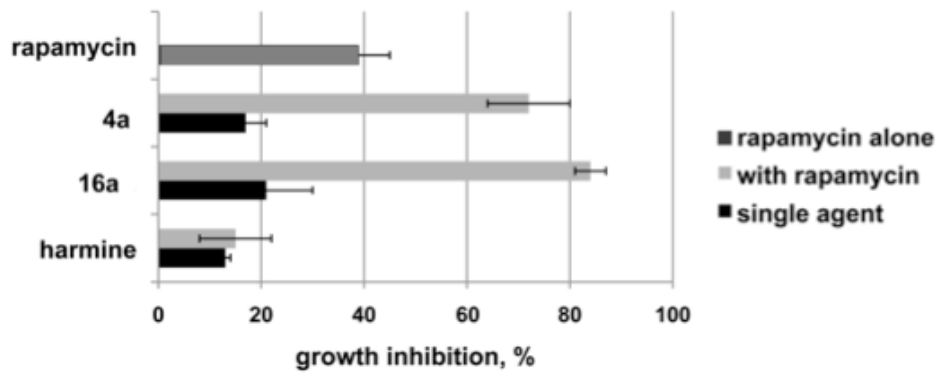

## Figure S2

|        |                        |                          |                         |            |                  |
|--------|------------------------|--------------------------|-------------------------|------------|------------------|
|        | 67                     |                          | 89                      |            |                  |
| DYRK1a | KIIKNKKAF              | . .LNQAQIEV              | RLELMNKHD               | TEM.       | .KYYIV HLKRHFMRN |
| Pim-1  | KHVEKDRISD             | WGELPNGTRV               | PM <del>E</del> VVLLKKV | SSG.       | .FSGVI RLLDWFERP |
| Pim-2  | KVIPRNRVLG             | WSPLSDSVTC               | PL <del>E</del> VALLWKV | GAGGGHPGVI | RLLDWFETQE       |
|        | <b>Hinge (121-128)</b> |                          |                         |            |                  |
|        | 122                    |                          |                         |            |                  |
| DYRK1a | HLCLVFEMLS             | YNLYDLLRNT               | NFRGVSLNLT              | RKFAQQMCTA | LLFLATPELS       |
| Pim-1  | SFVLIL <del>ERPE</del> | <del>PVQDL</del> DFDIFIT | ERGalQEELA              | RSFFWQVLEA | VR..HCHNCG       |
| Pim-2  | GFMLVLERPL             | PAQDLFDYIT               | EKGPLGEGPS              | RCFFGQVVAA | IQ..HCHSRG       |
|        |                        |                          | 187                     |            |                  |
| DYRK1a | IIHCDLKPEN             | ILLCNPKRSA               | IKIVDFGSSC              | QLGQRIYQ.Y | IQSRFYRSPE       |
| Pim-1  | VLHRDIKDEN             | ILI.DLNRGE               | LKLIDFGSGA              | LLKDTVYTDf | DGTRVYSPPE       |
| Pim-2  | VVHRDIKDEN             | ILI.DLRRGC               | AKLIDFGSGA              | LLHDEPYTDf | DGTRVYSPPE       |

**Figure S3**

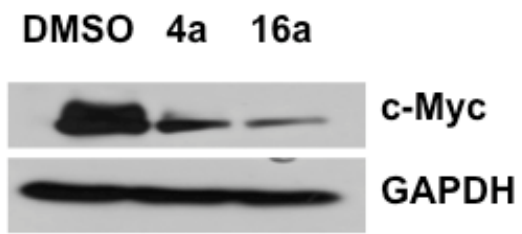

Supplement: NIHMS393179-supplement-1.pdf [file NIHMS393179-supplement-1.pdf]
